# 1 Imaging and quantification of prostate cancer- 2 associated bone by polarization-sensitive optical 3 coherence tomography

4 CHRIS ZHOU,<sup>1,2,3,4</sup> NAOMI JUNG,<sup>3,4</sup> SAMUEL XU,<sup>3,4</sup> FELIPE ELTIT-  
5 GUERSETTI,<sup>3,4</sup> XIN LU,<sup>1,2,5,6</sup> QIONG WANG,<sup>5,6</sup> DORIS LIANG,<sup>6,9</sup> COLM  
6 MORRISSEY,<sup>7</sup> EVA COREY,<sup>7</sup> LAWRENCE D. TRUE,<sup>8</sup> RIZHI WANG,<sup>5,6,9</sup> SHUO  
7 TANG,<sup>1,6\*</sup> MICHAEL E. COX<sup>3,4,9\*</sup>

8 <sup>1</sup>Department of Electrical and Computer Engineering, University of British Columbia, Vancouver, BC  
9 V6T 1Z4, Canada

10 <sup>2</sup>Stewart Blusson Quantum Matter Institute, The University of British Columbia, 2355 East Mall,  
11 Vancouver, British Columbia, V6T 1Z4, Canada.

12 <sup>3</sup>Department of Urologic Sciences, University of British Columbia, Vancouver, Canada.

13 <sup>4</sup>Vancouver Prostate Centre, Vancouver, Canada.

14 <sup>5</sup>Department of Materials Engineering, University of British Columbia, Vancouver, Canada.

15 <sup>6</sup>School of Biomedical Engineering, University of British Columbia, Vancouver, Canada.

16 <sup>7</sup>Department of Urology, University of Washington, Seattle, USA.

17 <sup>8</sup>Department of Laboratory Medicine and Pathology, University of Washington, Seattle, USA.

18 <sup>9</sup>Centre for Aging SMART, Vancouver, BC, Canada.

19

20 \*[tang@ece.ubc.ca](mailto:tang@ece.ubc.ca); [mcox@prostatecentre.com](mailto:mcox@prostatecentre.com)

## 21 Abstract:

22 Prostate cancer frequently metastasizes to bone, leading to a spectrum of osteosclerotic and  
23 osteolytic lesions that cause debilitating symptoms. Accurate differentiation of bone tissue or  
24 lesion types can provide opportunity for local pathologic investigation, which is critical for  
25 understanding the bone metastasis and remains challenging. Current imaging methods lack the  
26 ability to directly differentiate tissues based on collagen organization and may induce invasive  
27 effect on bone tissues. We introduce Polarization-Sensitive Optical Coherence Tomography  
28 (PS-OCT) to investigate normal, osteosclerotic, and osteolytic bone tissues. High-resolution  
29 PS-OCT imaging reveals collagen fiber arrangement, enabling nuanced distinction of degree  
30 of collagen alignment among different bone tissue types or regions. We present a novel feature  
31 named degree of ordered organization (DOO), derived from the multiple contrasts of PS-OCT  
32 that can quantitatively evaluate bone samples from different pathologic groups, including  
33 control, osteoblastic and osteolytic tissues. The capacity of PS-OCT to differentiate  
34 trabecular/lamellar and irregular (woven bone) regions within the same specimen is tested and  
35 validated on ex-vivo samples extracted from 13 subjects. Our study is the first time that PS-  
36 OCT is applied to metastatic bone disease with the aim of enhancing the understanding of bone-  
37 related pathologies, and potentially impacting clinical practice. This work demonstrates that  
38 PS-OCT can provide useful insight into bone microstructures, and thus it has potential  
39 applications across diverse bone disorders.

40 © 2023 Optical Society of America under the terms of the [OSA Open Access Publishing Agreement](#)

## 41 1. Introduction

42 Prostate cancer (PC) is the most prevalent malignancy in men, affecting 1 in 8 men during their  
43 lifetime. Although modern therapies have dramatically increased survival, 20% of those men  
44 will advance to an incurable metastatic disease. Approximately 90% of advanced PC patients  
45 develop bone metastases (PCBM)<sup>[REFs]</sup> which preferentially involve vertebrae, ribs, and

46 epiphyses of long bones. These PCBM give rise to debilitating symptoms, including bone pain,  
47 fractures, and spinal cord compression [3], underscoring the need for study of bone tissue  
48 samples to comprehend the intricacies of prostate cancer metastasis and develop effective  
49 treatment strategies.

50 PCBM present in a broad spectrum of forms, from osteolytic to highly  
51 osteosclerotic[refs]. Although the mechanisms are still unclear, it is thought that PC cells  
52 release factors that can activate osteoblasts or osteoclasts[refs]. In healthy condition, bone  
53 resorption releases growth factors that trigger bone formation. However in PC-affected bone  
54 regions, such newly generated bone lacks regular structure which is associated with a poor  
55 mechanical performance, increasing the risk of fracture and pain. Therefore, accurate structural  
56 characterization of PCBM, and appropriate imaging of these lesions hold paramount  
57 importance in diagnosis and treatment, and in the research for better therapeutic alternatives  
58 [refs].

59 Conventional imaging modalities, such as X-ray [6], Computed Tomography (CT) [7] and  
60 Magnetic Resonance Imaging (MRI) [8, 9], have been widely utilized for bone tissue  
61 characterization. While micro-CT can provide excellent spatial resolution, it lacks tissue-  
62 specific differentiation. MRI, including T2-weighted imaging, excels in soft tissue contrast but  
63 may not adequately visualize the microstructures of bone [10, 11]. Quantitative back scattered  
64 electron-scanning electron microscopy (qBSE-SEM) has gained popularity for assessing bone  
65 quality and microarchitecture, offering valuable insights into trabecular and cortical bone  
66 compartments [12]. However, it relies on electron attenuation measurements and lacks  
67 penetration into deep tissue, limiting its ability in *in-vivo* measurement and clinical  
68 applications. The limited penetration also does not allow for the capture of fine (3D) details of  
69 collagen organization, which are valuable for distinguishing bone/tissue architecture and the  
70 lesion of interest. Additionally, such electron absorption counting lacks sensitivity to collagen  
71 fibers that are anisotropic, thus cannot visualize soft tissues or detect subtle changes in bone  
72 composition, particularly crucial in the context of PCBM, where soft tissue infiltration may  
73 alter bone microstructure without significant changes in bone density. Consequently, qBSE-  
74 SEM may not be sensitive enough to differentiate between subtle variations in normal bone and  
75 PCBM.

76 PCBM often exhibit complex interactions with the bone microenvironment [6, 13-17],  
77 leading to microstructural changes (3D spatial distribution of cells and collagen organization)  
78 that require imaging techniques with high resolution, depth penetration, and specific  
79 functionality to be effectively characterized. To address these limitations and advance bone  
80 tissue characterization, alternative imaging modalities have been explored to examine changes  
81 to mineralized tissue, including Synchrotron micro-CT [18], Raman spectroscopy [19], and X-  
82 ray diffraction [20]. However, these modalities are either highly invasive, or cannot provide  
83 depth information. Polarization-Sensitive Optical Coherence Tomography (PS-OCT), a non-  
84 invasive 3D imaging technique, with its multi-contrast sensitivity, has the potential to emerge  
85 as a powerful tool in directly differentiating between different bone tissue types [21-23]. PS-  
86 OCT leverages the polarization properties of light to unravel intricate features of bone tissue,  
87 including collagen fiber organization and lacunar morphology. This unique capability enables  
88 PS-OCT to discern nuanced differences between various bone tissue types. Moreover, PS-OCT  
89 operates at a micrometer scale resolution and millimeter scale depth penetration [23],  
90 potentially allowing for the visualization of fine 3D collagen organizations and lacunar  
91 morphology alterations associated with bone metastases.

92 In this study, we apply PS-OCT imaging on osteosclerotic, and osteolytic lesions generated  
93 by prostate cancer metastasis, as well as age-matched, cancer free control samples. We use  
94 qBSE-SEM to image the PCBM samples and have experts label different bone tissue types and  
95 two different bone regions (trabecular and irregular). We then develop a feature called degree  
96 of ordered organization (DOO) which combines the multiple-contrast images provided by PS-  
97 OCT. Image registration between PS-OCT and SEM is applied to locate the same region of

98 interests (ROIs) between these two modalities. Quantification and statistical analysis are then  
99 conducted to test different bone tissue types and different bone regions. From the 13 bone  
100 samples used in this study, we found that the PS-OCT DOO image can successfully  
101 differentiate the osteoblastic tissues or the osteolytic tissues from the control group. Statistical  
102 significance is also found between the trabecular/lamellar and the irregular bone of PCBM  
103 defined on high-resolution qBSE-SEM images. By elucidating the potential clinical  
104 applications of PS-OCT in bone tissue differentiation, this work seeks to bridge the gap between  
105 cutting-edge imaging technology and clinical practice. The integration of PS-OCT into bone  
106 disorder investigation, particularly in PCBM, holds immense promise in advancing our  
107 understanding of bone-related cancer pathologies and empowering oncologists with precise and  
108 tailored therapeutic interventions.  
109

## 110 **2. Materials and methods**

### 111 *2.1 Sample obtention and preparation*

112 We obtained cadaveric vertebrae samples (n=9) from 9 patients who died of metastatic PC.  
113 Patients signed written informed consent for a rapid autopsy, under the Prostate Cancer Donor  
114 Program at the University of Washington IRB#2341 [24]. We also obtained 4 vertebrae samples  
115 from 4 age-matched male control donors from the University of British Columbia Body  
116 Donation Program. These procedures, as well as the corresponding imaging process, were  
117 approved by the institutional review board at the University of Washington and the University  
118 of British Columbia (H21-02668).

119 Cylindrical vertebral cores were obtained using a 11 mm diameter trephine. The cylindrical  
120 specimens were transversally cut into 1/3 - 2/3 of the total length, with a water-cooled diamond  
121 saw (IsoMet 4000, Buehler, Lake Bluff, IL, USA). Out of the two bone sections (of each  
122 specimen), the smaller one was used for histology (processing methods in Section 2.2) and the  
123 larger one was prepared for SEM and PS-OCT imaging. The sections were dehydrated by  
124 using a sequence of increasing acetone concentration in ethanol (70%, 90% and 100%, repeated  
125 twice, 2 days each). The dehydrated bone sections were then infiltrated in 50%, 80% and 100%  
126 spurr embedding medium in acetone (repeated twice for each concentration, Spurr low viscosity  
127 kit, PELCO, USA) for 3 days each. After infiltration, the bone sections were embedded in spurr  
128 embedding medium. The transverse surface of the embedded bone sections was ground with a  
129 series of carbide papers and polished with 1  $\mu$ m diamond suspension. The polished surface was  
130 carbon-coated and imaged in backscattered electron (BSE) mode in a scanning electron  
131 microscope (SEM, FEI Quanta 650, Oregon, USA).

### 132 *2.2 Histological process and assessment*

133 Bone sections obtained from the cadaveric vertebrae specimens were fixed in 10% buffered  
134 formalin for 24 hours, rinsed in phosphate-buffered saline (PBS) three times for 1 hour each,  
135 and decalcified in 10% formic acid for 5 days. The specimens were then dehydrated in an  
136 ethanol series (70%, 80%, 90%, 95%, 100%), cleared in xylene substitute, and paraffin  
137 embedded. Serial sections of 5 micrometres thickness were cut with a microtome.

138 The microscopy slides were stained with Masson's trichrome, to observe the distribution of  
139 bone and other cellular components. A sample was defined as osteolytic if the bone volume  
140 was <8% with no evidence of thickened trabeculae or intertrabecular bone deposition. A sample  
141 was classified as osteosclerotic if the bone volume was >35% or if there was evidence of  
142 thickened trabeculae or bone deposited in the intertrabecular spaces [25].

### 143 *2.3 PS-OCT system*

144 All the samples were imaged by a custom-built Jones-matrix-based PS-OCT system (more  
145 details can be found in Ref [26]). The system is developed based on a swept-source laser (Axsun  
146 Technology Inc., MA), with the center wavelength of 1.06  $\mu$ m, full width at half maximum  
147 (FWHM) bandwidth of 110 nm, and scanning rate of 100 kHz. The light from the source is split

148 by a 90:10 single mode optical fiber coupler, where the 90% port of the coupler is connected  
149 to a passive polarization delay unit, and the 10% port to the reference arm. With a passive  
150 polarization delay unit, two orthogonal polarization states of light are separated and delayed in  
151 time. The light then passes through a 75:25 fiber coupler and the 25% port is sent to illuminate  
152 the sample. The back-scattered signal from the sample passes through the fiber coupler again  
153 and the 75% port is sent to the detection unit. Light from the sample arm and the reference arm  
154 are guided to a polarization diversity (PD) detection unit. The polarization sensitive features  
155 are measured by a Jones-matrix-based method [xx]. The average power on the sample is around  
156 2 mW. The sensitivity of the PS-OCT system is 92 dB. The axial and lateral resolutions are  
157 measured to be  $\sim 7.2 \mu\text{m}$  and  $\sim 19.2 \mu\text{m}$ , respectively. Using the PS-OCT system, multiple  
158 contrasts related to the polarization of backscattered light were acquired from 3-D volumes.  
159 The horizontal scanning range can be set upon user selection between 2 mm to 12 mm. The  
160 depth detection range is usually limited by light attenuation. While the system can provide  
161 theoretical maximum depth range as  $\sim 2.8$  mm (in air), the practical penetration in our practice  
162 is between 0.8 to 1.2 mm (in air). The actual penetration depth can be calculated by considering  
163 the refractive index of the bone samples. In this study, each sampling region is imaged into a  
164 3D volumetric data of 10mm (X) by 10mm (Y) by  $\sim 1$ mm (Z, depth).

#### 165 *2.4 Multi-contrast imaging*

166 By using Jones matrix detection, PS-OCT allows us to assess multiple contrasts from tissues.  
167 In this study, we utilized PS-OCT to acquire four distinct image contrasts: intensity image,  
168 phase retardation image, degree of polarization uniformity (DOPU) image, and effective signal-  
169 to-noise ratio (ESNR) image [21-23]. ESNR was also used to select the imaging depth for  
170 reliable phase retardation calculation with a threshold of 10 dB [26].

171 The intensity image represents the backscattered light intensity from the sample and  
172 provides a grayscale visualization of the tissue's overall amplitude of scattering signals. It offers  
173 an anatomical overview of the bone structure, aiding in identifying different tissue regions.  
174 However, a high scattering signal may be generated from either highly organized collagen  
175 structures or highly damaged tissues, resulting in a possible ambiguity in this assessment of  
176 tissue integrity. Therefore, we do not use the intensity image for further quantification.

177 The phase retardation image highlights the birefringence properties of collagen fibres in  
178 bone tissue. It visualizes the phase delay of polarized light as it interacts with the tissue, offering  
179 insights into the orientation and organization of collagen fibres. When light of two orthogonal  
180 polarization states shine on aligned collagen fibres, the polarized light parallel or perpendicular  
181 to the collagen fibres generate a phase delay, which is quantified as phase retardation. When  
182 collagen fibres are randomly oriented, no phase delay is generated. Thus, strong phase  
183 retardation accumulation along the depth indicates tissue with well-aligned fibres. However,  
184 not all the well aligned fibres will exhibit strong phase retardation. For the cases when the fibres  
185 are perfectly aligned in the perpendicular orientation to the tissue surface (or parallel to the  
186 illumination beam), the phase accumulation will be low. In bone tissue, such a situation is rare  
187 and negligible.

188 The DOPU image quantifies the uniformity of polarization states in the tissue [27]. By  
189 applying spatial averaging on the pixel-based Stokes Vectors, DOPU can represent the  
190 randomness of spatial polarization changes. High DOPU values indicate regions with more  
191 uniform polarization states, which is related to more organized collagen micro-structures. Low  
192 DOPU values indicate regions with random polarization states (e.g. polarization scrambling),  
193 which attribute to higher level of micro-structural irregularity or higher degree of  
194 mineralization [22, 28]. Therefore, DOPU can be correlated with different bone micro-structure  
195 or mineralization changes.

196 The ESNR image, obtained by combining the four Jones elements, can be used to represent  
197 how subtle polarization features vary over the different polarization components [29, 30].  
198 Basically, ESNR considers the SNR of each Jones element as well as their mutual imbalance.

199 Strong yet randomly distributed birefringence would result in low ESNR, while moderate yet  
200 regularly organized birefringence would yield high ESNR. Therefore, ESNR can be very useful  
201 in some complex situations where bone has undergone damage and remodelling, resulting in  
202 the co-existence of both high and low birefringence.  
203

## 204 *2.5 Degree of ordered organization (DOO)*

205 Several contrasts from PS-OCT can potentially be usefully in the characterization of  
206 PCBM. For example, accumulated phase retardation can indicate the organization of  
207 collagen fibres, DOPU can detect polarization scrambling caused by mineralization, and  
208 ESNR can detect polarization-sensitive changes related to fibre orientation and  
209 randomness. While each of those contrasts can indicate some aspects of PCBM, we seek to  
210 utilize all of them together to define a single parameter that provides the most  
211 comprehensive differentiation between the different bone types and bone regions. For this  
212 purpose, we have defined DOO by combining the phase retardation ( $\phi$ ), DOPU ( $\Delta$ ), and  
213 ESNR ( $E$ ) as follows:

$$214 \quad \quad \quad DOO = E (\phi/\pi) \Delta \quad (2)$$

215  
216 Note that the phase retardation is normalized to its maximum accumulation value,  $\pi$ . After  
217 combination, the DOO yields an energy-level decibel unit (dB). For each pixel, the range is set  
218 between 0 to 80 dB upon to a user selection in LabView, which is defined by examining  
219 different biology sample. In this study, the average-based en-face map results in a maximum  
220 pixel value of 58.9 dB. In this case, the maximum bound for color mapping is defined as 60 dB  
221 for all the en-face DOO contrast images.

222 Figure 1 shows a comparison of the composite DOO contrast image with the other PS-OCT  
223 contrast images of a PCBM sample. The left column, from top to bottom, shows cross-sectional  
224 view of intensity, ESNR, phase retardation, DOPU, and DOO images, respectively. The right  
225 column shows en face view of (i) intensity, (ii) ESNR, (iii) phase retardation, (iv) DOPU, and  
226 (v) DOO images, respectively. All the en-face images in this study are obtained by using a slab  
227 of 100 pixels (~400  $\mu\text{m}$ ) thick with average-based projection. The corresponding SEM image  
228 of the same location is shown in Fig. 1(b)-(vi) as a reference. Compared to the individual  
229 contrasts of PS-OCT, the composite DOO contrast improves the visualization of subtle features  
230 and details in the bone tissue. The arrows in Fig. 1(b)-(v) mark some example bundle-shaped  
231 features that yield high DOO values, which match very well with the highly organized bundles  
232 of collagen clusters as shown in the SEM image. Note that the high DOO regions may not  
233 necessarily be a bundle-shape. For example, there is a connective area (marked as asterisk)  
234 observed in the DOO map but not shown in the SEM image, which is obtained due to the OCT's  
235 capability of depth imaging. This enhanced contrast of DOO facilitates the identification of  
236 microstructural alterations associated with bone metastases or other pathological conditions.  
237 Since DOO has integrated all the information from phase retardation, DOPU, and ESNR, from  
238 now on, we will mainly show the intensity and DOO images for differentiating control,  
239 osteosclerotic, and osteolytic bone tissues. All the DOO images shown in this manuscript share  
240 the same color bar, meaning that the DOO values can be compared among the DOO images  
241 from different samples. As an example, the highest DOO value comes from a control sample  
242 (Fig. 6(c) in Section 3.3).  
243

## 244 *2.6 Quantification of bone regions*

245  
246 Figure 2 demonstrates the procedure for differencing and quantifying the two types of bone  
247 regions using qBSE-SEM and PS-OCT. Fig. 2(a) shows a high resolution qBSE-SEM image,

248 which is used by a team of four bone experts to identify and label the trabecular and irregular  
249 bone regions, and create masks of those region using MATLAB, respectively. In principle, the  
250 qBSE images can demonstrate the organization of bone fibres in the observed 2D plane, which  
251 can to some extent represent the bone region types for certain locations. The areas with  
252 uniformly aligned/packed collagen clusters (characterized as lines and elongated bricks) are  
253 attributed as the trabecular region, while the areas with randomly distributed “woven” type  
254 collage are defined as the irregular region. Fig. 2(b) shows the mask of trabecular bone (blue)  
255 corresponding to Fig. 2(a). In Fig. 2(c), the masks generated from high resolution qBSE-SEM  
256 images are overlaid on top of the low-magnification SEM image, where the locations of the  
257 bone regions are labeled and the masks are shown as blue for trabecular and red for irregular  
258 regions. Fig. 2(d) shows the masks corresponding to Fig. 2(c). These procedures are applied to  
259 the SEM images of all samples reported in this study.

260 Since the low-magnification SEM image has been adjusted and registered to the PS-OCT  
261 images, the masks generated from qBSE-SEM can now be applied onto the PS-OCT images.  
262 Figs. 2(e) and 2(f) show the *en face* PS-OCT intensity and DOO images, respectively, with the  
263 masks highlighted by the green boxes (the blue and red colors are not shown here in order to  
264 display the structures underneath the masks). From the PS-OCT images, the trabecular bone  
265 regions show higher scattering amplitude in the intensity image and higher degree of  
266 organization in the DOO image than irregular bone regions. Noticeably, the curvature patterns  
267 of the trabecular regions are clearly observed in the DOO images. Most of the trabecular bone  
268 regions show higher DOO values, while the irregular bone regions show lower DOO values.  
269 Therefore, the DOO image differentiates the trabecular and irregular bone regions better than  
270 the intensity image and the low-magnification SEM image. This example further highlights the  
271 utility of PS-OCT in differentiating bone regions. Afterwards, quantification methods can be  
272 applied on the PS-OCT images according to the masks.

273 Each PS-OCT data set can be considered as a multi-channel 3D structure. Once the 2d masks  
274 (regarded as a cluster of pixel locations) are generated, they will be attributed as segmented  
275 regions in the X-Y dimension, and then be multiplied to the 3D data set. Note that an  
276 assumption is applied here that the segmentation in X-Y plane can represent the region divisions  
277 along the sample depth. In this case, one can obtain the 3D data sets representing the trabecular  
278 region and the irregular region, respectively. A surface segmentation algorithm is applied to the  
279 data structure before segmentation to gate out all the pixel values above tissue surface. The  
280 mean and standard deviation values of each 3D region are then calculated as the quantification  
281 results. These procedures are applied to all the PS-OCT data sets (including all the possible  
282 channels) of all the samples reported in this study. For each subject, all the non-zero pixels of  
283 imaged regions are counted in the statistical analysis.  
284

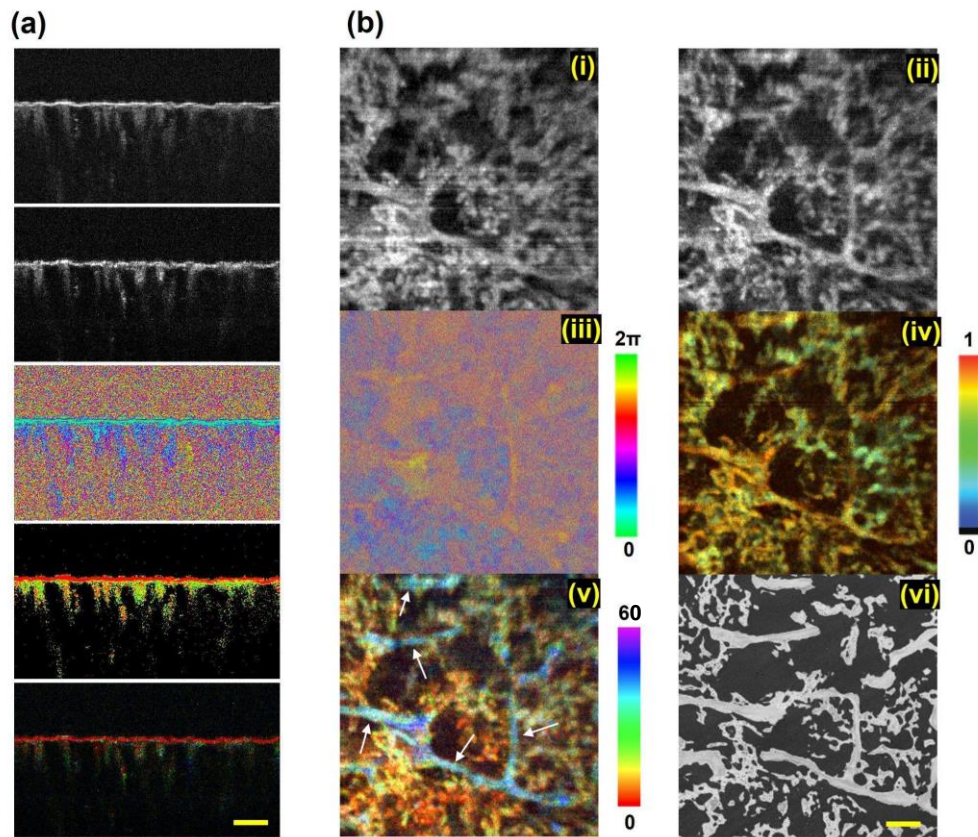

285  
286  
287  
288  
289  
290  
291  
292

Figure 1. PS-OCT multiple contrast images on an example bone sample. (a) Cross-sectional images from top to bottom: intensity image, ESNR, phase retardation image, DOPU image, and DOO image. (b) *en face* images of the bone tissue: (i) intensity, (ii) ESNR, (iii) phase retardation, (iv) DOPU, (v) DOO, comparing the (vi) SEM image corresponding to the same location. The scale bar is 500  $\mu\text{m}$ .

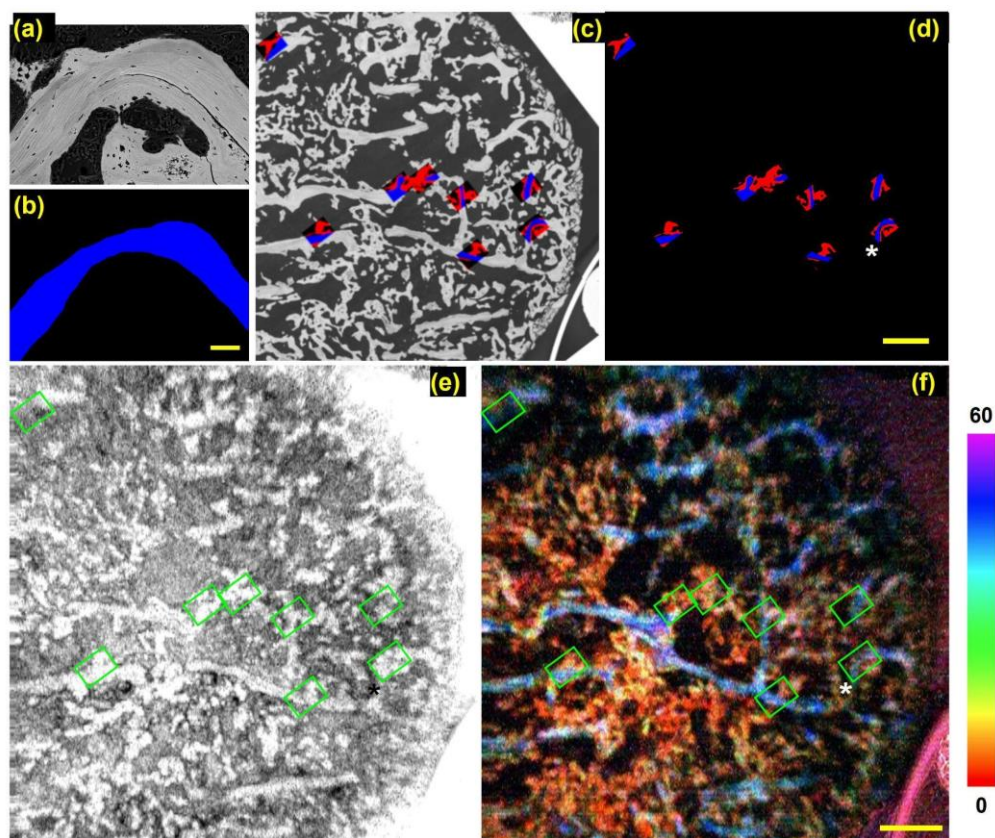

293  
294  
295  
296  
297  
298  
299  
300  
301  
302  
303

Figure 2. The bone sample was imaged using both qBSE-SEM and PS-OCT. The high magnification SEM image (a) was used to differentiate between the trabecular and sclerotic regions of bone. These regions were selected and converted to masks (b), and then overlaid onto the low magnification SEM image (c). By registering the low magnification SEM image with the PS-OCT image and applying the mask (d), the collagen alignment properties can be quantified for the trabecular and sclerotic bone regions using data from PS-OCT; here the locations of the quantifications are marked with green windows on the *en face* (e) intensity image and (f) DOO image. The blue and red region in (c) and (d) indicate the trabecular and irregular regions, respectively. The scale bar in (a-b) is 200  $\mu\text{m}$ , and in (c-f) is 1 mm.

304

### 3. Results

305

#### 3.1 PS-OCT imaging of different bone samples

306

Nine PCBM samples are imaged with qBSE-SEM and PS-OCT. Figure 3 demonstrates the applicability of PS-OCT using four of these bone samples. From left to right, there are three osteoblastic samples (S1, S2, S3) and one osteolytic sample (S4). Histological images of these samples are shown in Figure 4. The type of bone sample is determined by using SEM, CT images and confirmed by histological observation of sections obtained from the same specimen (~1 mm away from SEM-PS-OCT observation plane). From the intensity *en face* images obtained by PS-OCT (the first row), we find that osteoblastic samples have more bone tissue compared to the osteolytic sample, which is supported by the SEM images (third row). Note that the background of sample S1 is mostly black because the overall thickness (including the embedding medium) of this sample is higher than the other samples.

313  
314  
315



316 From the PS-OCT DOO *en face* images, we can observe highly organized bone features in  
317 Samples S1 and S3, but very minimally organized bone in S2. In S4, there are some residual  
318 organized bone features in the remaining bone trabeculae, however, surprisingly they are not  
319 as well aligned as the normal control samples (Fig. 6), or the organized features in the Samples  
320 S1 and S3. Such observations can be confirmed from the in-parallel SEM investigation: Sample  
321 S1 contains the most residual trabecular bone, sample S2 contains very little residual trabecular  
322 bone, and Sample S3 is the middle case (i.e. moderate amount of residual trabecular bone);  
323 Sample S4 shows some irregular bone which is not well organized. Such information is further  
324 confirmed by high resolution SEM images (e.g. Fig. 2(a)). Note that the well-organized bone  
325 in SEM images will show some textured patterns with parallel lines. Similar match up can be  
326 further confirmed by the histology images (see Figure 4).  
327  
328

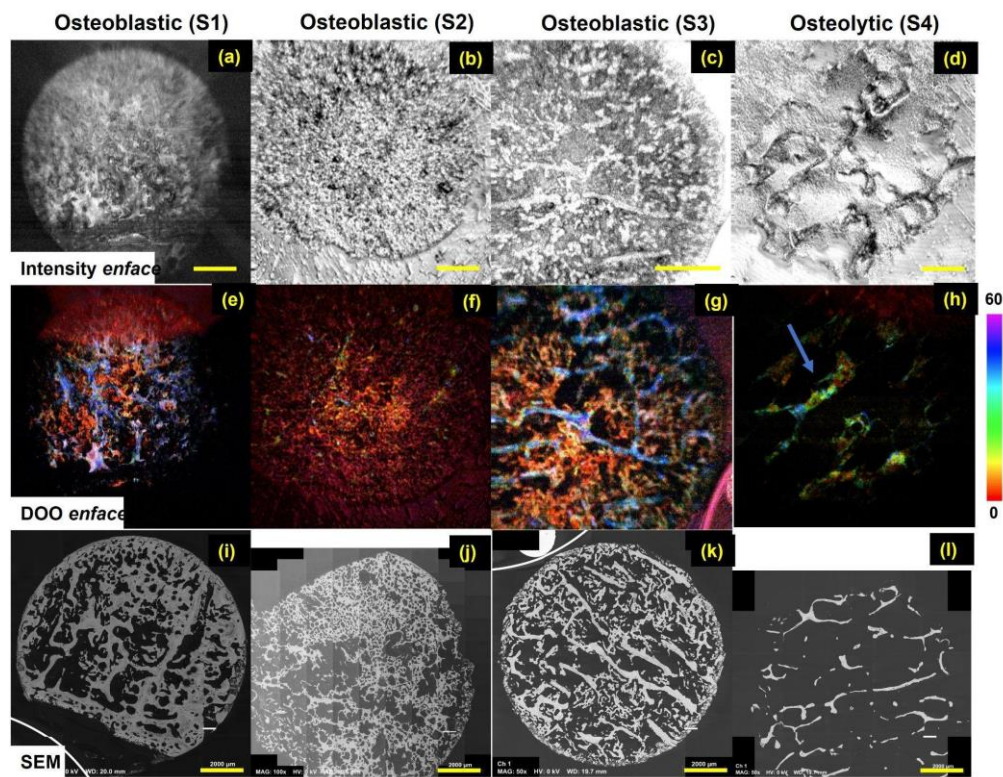

329  
330  
331  
332 Figure 3. Example imaging results of three osteoblastic bone samples and one osteolytic bone  
333 sample: (a-d) PS-OCT *en face* intensity images, (e-h) PS-OCT *en face* DOO images, with  
334 corresponding (i-l) SEM images. The scale bar is 2mm, the intensity and the DOO images of  
335 each sample are co-registered and share the same scale. Possible but minor errors may exist  
336 when matching the scale of PS-OCT and the SEM images.

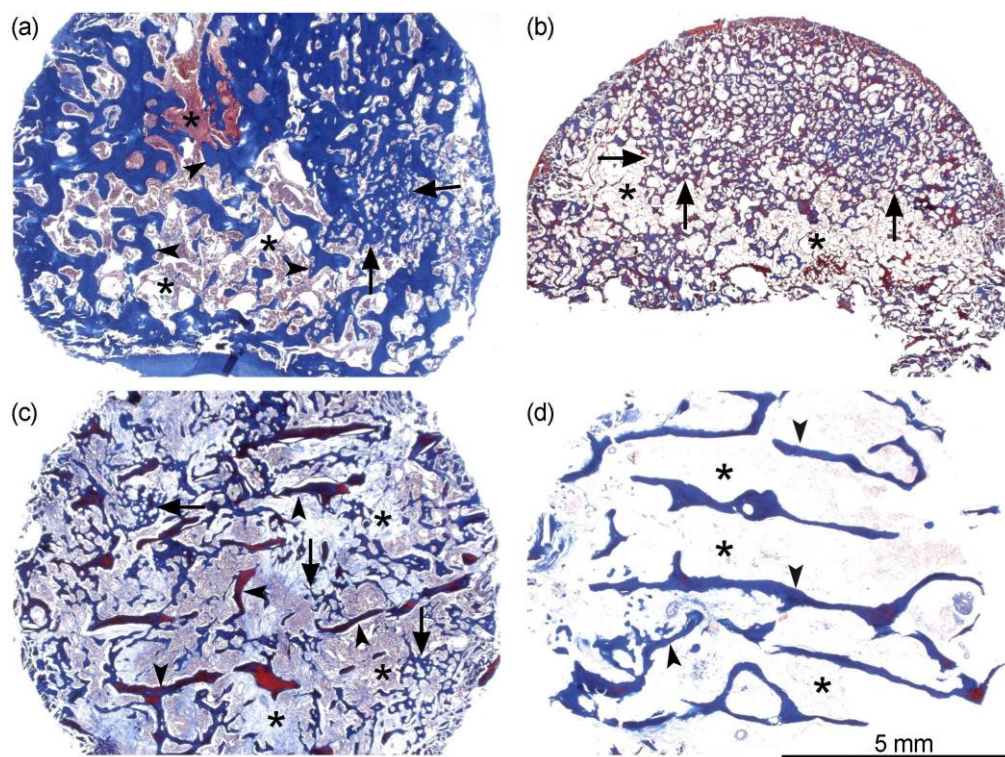

337  
338  
339  
340  
341  
342  
343  
344  
345  
346  
347

Figure 4. Histological images of characteristic samples analyzed with PS-OCT. (a) Sample S1, with abundant residual trabeculae (arrowheads), visible irregular prostate cancer associated bone (arrows) and reduced medullary spaces (asterisks). (b) Sample S2, with minimal if any residual trabeculae, and most of the medullary space (asterisks) occupied by irregular bone (arrows). (c) Sample S3, with evidence of trabeculae (arrowheads), and irregular bone (arrows). (d) Sample S4, osteolytic, with presence of residual trabeculae (arrowheads) this is often reduced in thickness, absence of irregular bone and enhanced medullary spaces (asterisks). Staining: Masson's trichrome.

### 348 3.2 Quantification and statistical results

349 The quantification of DOO images was then conducted on all the images captured from the  
350 three groups of samples: the normal control, osteoblastic, and osteolytic samples. Among the  
351 samples we used, the PS-OCT DOO image can be used to differentiate the osteoblastic samples  
352 (e.g. S1-S3) or the osteolytic samples (e.g. S4) from the control group. However, when  
353 accounting for all the features in all the images, the difference between the osteoblastic and  
354 osteolytic samples are statistically insignificant. This could be explained by the complexity of  
355 the bone lesions. In the osteoblastic samples, the amount of residual trabecular bone varies  
356 among individual samples. Even in the case containing a moderate amount of residual  
357 trabecular bone (e.g. S3), the features of random bone and highly organized bone coexist, which  
358 result in the broadening of the feature space. In osteolytic samples, there is a reduced amount  
359 of bone resulting from bone resorption, without any bone deposition. The DOO value of the  
360 osteolytic samples is lower than the trabecular regions in the osteoblastic samples, but higher  
361 than the irregular regions.

362 We then tested the difference between the trabecular/lamellar and irregular regions according  
363 to the procedures introduced in Section 2.6. For each region, we record its mean DOO value  
364 (one from lamellar and one from irregular). By combining the 72 regions over the 9 samples,

365 we can compare the DOO value distribution and difference between the two different regions.  
366 Figure 5 shows the statistical results over the  regions among the nine PCBM samples. We  
367 find that the PS-OCT DOO image is helpful to differentiate between  bone regions, where  
368 we find a statistically significant difference between them  (i.e. trabecular and irregular).  
369 Such a difference is validated by examining the high-resolution SEM and histology images.  
370 This result shows the possibility of using the non-invasive tool PS-OCT to identify the ROIs  
371 for specific research values/questions, without expensive (including resource, effort and time)  
372 and invasive imaging procedures (SEM, histology, etc.).  
373

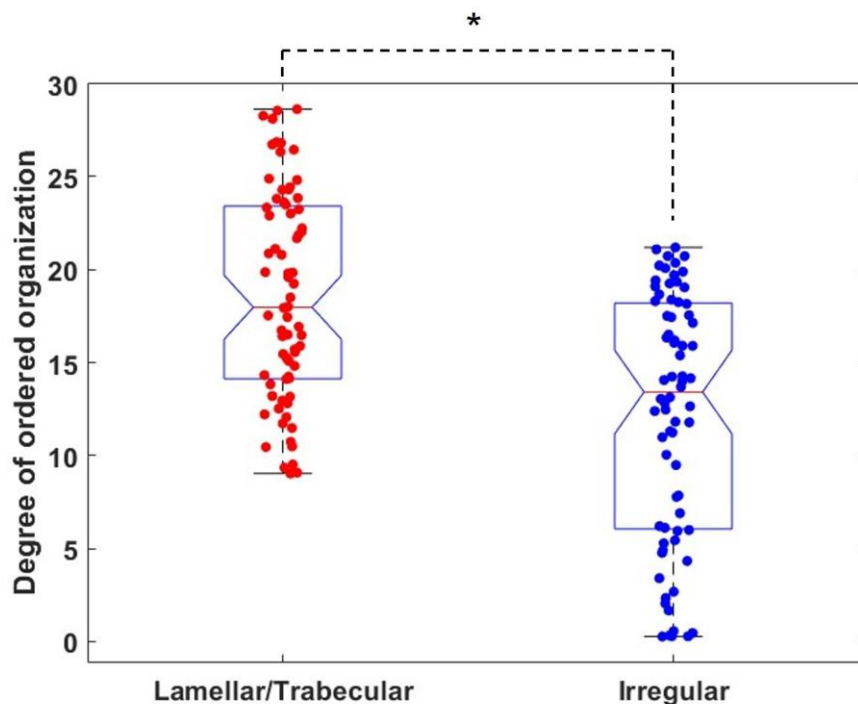

374  
375 Figure 5. Statistical results of DOO images comparing between two bone lesion regions:  
376 lamellar and irregular. The p-value is 0.036.

377

### 378 3.3 Example data from the control group

379 Overall, the samples in the control group usually exhibit higher DOO compared to disease  
380 groups, which can be observed from the examples shown in Fig. 6(a-b). However, there is also  
381 sometimes a complex situation, as shown in Fig. 6(c). The example image in Fig. 6(c) actually  
382 renders very high DOO values in the middle (dark blue), surrounded by some low DOO features  
383 (red). From the images of the control samples, we confirm the diversity of the bone structures.  
384 The existence of wide distribution (both low and high DOO) and narrow distribution (the biased  
385 distribution for overwhelmingly high DOO) also shows the robustness of the quantification  
386 approach.  
387

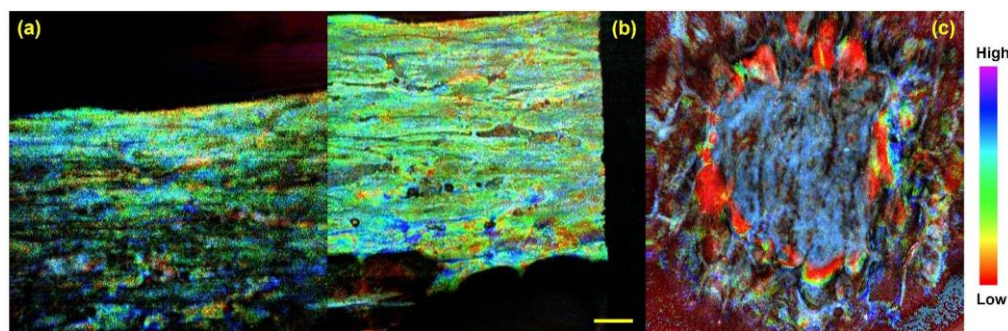

Figure 6. DOO images from the bone tissue samples in the control group. The scale bar is 1 mm.

**Table 1. Sample data for 9 PCBM samples and 4 controls samples [24].**

| Sample ID | Vertebra | Classification | Micro-CT BV/TV |
|-----------|----------|----------------|----------------|
| S1        | L1       | OB Tra         | 0.44           |
| S2        | T11      | OB WOT         | 0.41           |
| S3        | T12      | OB Tra         | 0.34           |
| S4        | L2       | Osteolytic     | 0.08           |
| S5        | L5       | OB Tra         | 0.31           |
| S6        | T11      | OB WOT         | 0.30           |
| S7        | T11      | Mixed          | 0.20           |
| S8        | L5       | OB WOT         | 0.58           |
| S9        | L4       | Mixed          | 0.13           |
| C1        | L3       | Control        | 0.08           |
| C2        | L3       | Control        | 0.16           |
| C3        | L2       | Control        | 0.10           |
| C4        | -        | Control        | -              |

BV/TV - bone volume/total volume, OB Tra - osteoblastic with residual trabeculae, OB WOT - osteoblastic without residual trabeculae.

#### 4. Discussions and conclusions

In this study, PS-OCT imaging is applied to different bone samples with PCBM. Exploring bone tissue characterization is pivotally significant to understanding the intricacies of PCBM and their underlying mechanisms. Using PS-OCT brought forth a remarkable revelation – an augmented DOO feature indicative of ordered collagen alignment within trabecular/lamellar bone regions. This finding may offer a glimpse into the microstructural intricacies that accompany PCBM. Importantly, DOO offers a link to the local well-aligned region as indicated in the high resolution qBSE-SEM image. Such correlative insights signify the potential of PS-OCT as a powerful tool for microstructural evaluation, which may have implications not only for PCBM but also for other bone-related disorders.

We evaluated a wide array of PCBM and age-matched controls which allowed us to decipher the intricate 3D collagen organization patterns associated with PCBM. This sheds light on the complex interplay between collagen alignment and bone tissue alterations. The insights gleaned from this approach have the potential to redefine our understanding of bone tissue dynamics in the context of PCBM. To extend this concept, we emphasize the speed of PS-OCT which can non-invasively record a 3-D volume (~250 images) within 5 seconds making it well-suited for dynamic studies.

415 A surprising finding in this study was the evidence of collagen disorganization in the  
416 residual trabeculae of osteolytic samples compared with residual trabeculae of osteoblastic  
417 samples and age matched controls. This differs from osteoblastic lesions in which the residual  
418 trabeculae will remain and indeed will be covered by irregular bone [Roudier 2008], and have  
419 similar organization than the control samples. These could be explained by the nature of  
420 osteolytic lesions, in which the remanent bone is in the process of being resorbed [Morrissey et  
421 al. JBMR 2013], and therefore it has altered structure observable by PS-OCT but not visible by  
422 other means. This could be a critical observation, since it suggests that the alterations in  
423 collagen structure during remodelling may start previously to the evident bone resorption  
424 process by osteoclasts, although this requires further investigation.  
425

426 The integration of MATLAB-based image analysis tools, empowered by the substantial  
427 imaging depth of PS-OCT, can be used for more detailed analysis, e.g. the examination of  
428 lacunae morphology. According to the regions of high or low DOO, one can decide on more  
429 specific regions to investigate or link the collagen organization to the cellular (lacunae)  
430 quantifications. All these images can be obtained at fast speed by PS-OCT (one 3D volume  
431 within a few seconds), which will speed up the investigation and trial-and-error cycles during  
432 the research work.

433 There are also limitations of the current work. During the implementation of the proposed  
434 approach, we realized the hyper-sensitivity of the PS-OCT images (not only DOO) to different  
435 environmental conditions. For example, ESNR is very sensitive to the depth of observation (the  
436 intensity image is similarly affected), DOPU is very sensitive to low-scattering regions, and the  
437 phase retardation may be sensitive to residual collagen features other than from bone (such as  
438 cartilage or tendon). In processing the 2-D *en face* projection, surface tilting may impact the  
439 feature and cause artifacts. These detailed issues are important and need to be considered in  
440 future work.

441 As the PS-OCT field continues to evolve, new contrasts for this multi-contrast platform are  
442 being developed, utilizing the complexity of matrix representations of light polarization  
443 properties. For example, local birefringence can represent a similar feature as the phase  
444 retardation but offer more localized details. We have also tried to use the local birefringence in  
445 this study. The performance was similar to phase retardation when differentiating between the  
446 bone tissues (Fig. 5), where the osteoblastic and osteolytic samples are not significantly  
447 different. However, the performance (p-value) in differentiating between the two bone lesion  
448 types was actually slightly worse compared to the current case using phase retardation (Fig. 5)  
449 regardless of higher requirements for surface segmentations when using local birefringence [31,  
450 32]. One possibility could be the actual local fibre bundles may not be as significantly different  
451 between the trabecular region and the irregular region as we expected (from this study and also  
452 the high-resolution SEM images), which can be indirectly supported from mechanical tests in  
453 our in-parallel studies. The reason that we observe such “bulk” fibre organization difference  
454 could be some group effects that require sufficient depth range to accumulate. To simplify, the  
455 “trabecular” region may not be completely trabecular but instead partially damaged and  
456 remodelled in some way that we are unable to identify from 2D imaging. To this end, optic axis  
457 (another new contrast) or more advanced depolarization metrics using Mueller matrix [33] may  
458 also be helpful to find the orientation of collagen fibers. Another reason for selecting phase  
459 retardation in this study is that we are now, at this stage, relying on a clear 2D map for  
460 understanding the bone with the support of SEM, where the depth-dependent details can be  
461 summing/averaging with detail vanishing.

462 Note that this study is using ex-vivo samples only. Given the nature of the complexity and  
463 difficulty of bone treatment, it is necessary to first provide some proof of concept before going  
464 to practical clinics. For in-vivo applications, we will develop a fiber-based endoscope [cite  
465 endoscope OCT] as the detection arm. Recently, Yang et al implemented endovascular OCT in  
466 imaging the spinal cord and its internal fluid environment from five animals [cite it]. From the

467 results, the clear cerebrospinal fluid also provided an excellent medium for image acquisition,  
468 with no detectable artifact from the contents of the cerebrospinal fluid. Their work successfully  
469 proved the feasibility of spinal cord OCT imaging in living bodies, however, they did not utilize  
470 the advantages of light polarization in assessing bone features. In our future study, we will  
471 develop a similar device to conduct in-vivo vertebral imaging with PS-OCT.

472 In conclusion, the combination of conventional techniques (e.g. CT, SEM) with the  
473 innovative application of PS-OCT has enabled a comprehensive exploration of bone tissue  
474 alterations within PCBM. Our study demonstrates the potential of PS-OCT as an imaging  
475 tool that reveals nuanced collagen alignment variations, fostering the understanding of  
476 PCBM microstructure. This endeavour resonates not only within the domain of PCBM research  
477 but also augments our broader comprehension of bone tissue dynamics and paves the way for  
478 future advancements in bone-related pathologies.

479

### 480 **Acknowledgements**

481

482 We thank the patients and their families, Celestia Higano, Evan Yu, Elahe Mostaghel, Heather  
483 Cheng, Pete Nelson, Bruce Montgomery, Mike Schweizer, Andrew Hsieh, Paul Lange,  
484 Jonathan Wright, Daniel Lin, Funda Vakar-Lopez, Xiaotun Zhang, Martine Roudier, Lawrence  
485 True, Robert Vessella, and the rapid autopsy teams for their contributions to the University of  
486 Washington Prostate Cancer Donor Rapid Autopsy Program. We thank the donors and families  
487 of the University of British Columbia Body Donor Program, and the contributions of Matthew  
488 Tinney, Grant Regier, Manouchehr Madani Civi, Adel Hajjaj, Lexi Busse and Edwin Moore.

489

### 489 **Funding**

490 Canadian Institutes of Health Research (CIHR)/Collaborative Health Research Projects (CPG-  
491 151974); Natural Sciences and Engineering Research Council of Canada  
492 (NSERC)/Collaborative Health Research Projects (CHRP 508405-17); NSERC/Discovery  
493 Grants Program (RGPIN-2017-05913). Cancer Research Society Operating grant (#839872).  
494 A Pilot Project Award from The Pacific Northwest Prostate Cancer Specialized Program of  
495 Research Excellence (P50CA97186), the PO1 NIH grant (PO1CA163227), and the institute for  
496 Prostate Cancer Research. MC and FE received funding from Prostate Cancer Foundation of  
497 British Columbia Grant in Aid (2021-2022). The work of NJ and SX has been partially funded  
498 by the BioTalent Canada Student Work Placement Program. FE holds a trainee award from  
499 Michael Smith Foundation for Health Research (RT-2021-1742).

500

### 500 **Disclosures**

501 The authors have no financial interests or potential conflict of interest to disclose concerning  
502 this work.

503

### 503 **References**

- 504 1. H. Sung, J. Ferlay, R. L. Siegel, M. Laversanne, I. Soerjomataram, A. Jemal, and F. J. C. a. c. j. f. c. Bray,  
505 "Global cancer statistics 2020: GLOBOCAN estimates of incidence and mortality worldwide for 36 cancers in 185  
506 countries," **71**, 209-249 (2021).
- 507 2. M. Esposito, T. Guise, and Y. J. C. S. H. p. i. m. Kang, "The biology of bone metastasis," **8** (2018).
- 508 3. S. J. P. Mercadante, "Malignant bone pain: pathophysiology and treatment," **69**, 1-18 (1997).
- 509 4. D. Chappard, B. Bouvard, M.-F. Baslé, E. Legrand, and M. J. M. Audran, "Bone metastasis: histological  
510 changes and pathophysiological mechanisms in osteolytic or osteosclerotic localizations. A review," **95**, 65-75 (2011).
- 511 5. M. Martín-Fernández, K. Valencia, C. Zandueta, C. Ormazábal, S. Martínez-Canarias, F. Lecanda, and C.  
512 J. T. o. de la Piedra, "The usefulness of bone biomarkers for monitoring treatment disease: a comparative study in  
513 osteolytic and osteosclerotic bone metastasis models," **10**, 255-261 (2017).
- 514 6. N. M. Navone, M. Olive, M. Ozen, R. Davis, P. Troncoso, S.-M. Tu, D. Johnston, A. Pollack, S. Pathak,  
515 and A. C. J. C. c. r. a. o. j. o. t. A. A. f. C. R. Von Eschenbach, "Establishment of two human prostate cancer cell lines  
516 derived from a single bone metastasis," **3**, 2493-2500 (1997).
- 517 7. H. K. Genant, K. Engelke, and S. Prevrhal, "Advanced CT bone imaging in osteoporosis," *Rheumatology*  
518 **47**, iv9-iv16 (2008).

- 519 8. B. C. Vande Berg, J. Malghem, F. E. Lecouvet, and B. Maldaque, "Magnetic resonance imaging of the  
520 normal bone marrow," *Skeletal Radiology* **27**, 471-483 (1998).
- 521 9. D. C. Karampinos, S. Ruschke, M. Dieckmeyer, M. Diefenbach, D. Franz, A. S. Gersing, R. Krug, and T.  
522 Baum, "Quantitative MRI and spectroscopy of bone marrow," *Journal of Magnetic Resonance Imaging* **47**, 332-353  
523 (2018).
- 524 10. S. A. Shapiro, J. R. Arthurs, M. G. Heckman, J. M. Bestic, S. E. Kazmerchak, N. N. Diehl, A. C. Zubair,  
525 and M. I. J. C. O'Connor, "Quantitative T2 MRI mapping and 12-month follow-up in a randomized, blinded, placebo  
526 controlled trial of bone marrow aspiration and concentration for osteoarthritis of the knees," **10**, 432-443 (2019).
- 527 11. H.-Z. Wu, X.-F. Zhang, S.-M. Han, L. Cao, J.-X. Wen, W.-J. Wu, and B.-L. J. A. o. o. Gao, "Correlation of  
528 bone mineral density with MRI T2\* values in quantitative analysis of lumbar osteoporosis," **15**, 1-7 (2020).
- 529 12. T. Tang, W. Wagermaier, R. Schuetz, Q. Wang, F. Eltit, P. Fratzl, and R. J. A. B. Wang,  
530 "Hypermineralization in the femoral neck of the elderly," **89**, 330-342 (2019).
- 531 13. C. Morrissey, and R. L. J. J. o. c. b. Vessella, "The role of tumor microenvironment in prostate cancer bone  
532 metastasis," **101**, 873-886 (2007).
- 533 14. J. H. Pinthus, T. Waks, D. G. Schindler, A. Harmelin, J. W. Said, A. Beldegrun, J. Ramon, and Z. J. C. r.  
534 Eshhar, "WISH-PC2: a unique xenograft model of human prostatic small cell carcinoma," **60**, 6563-6567 (2000).
- 535 15. E. Corey, J. E. Quinn, F. Bladou, L. G. Brown, M. P. Roudier, J. M. Brown, K. R. Buhler, and R. L. J. T.  
536 P. Vessella, "Establishment and characterization of osseous prostate cancer models: Intra-tibial injection of human  
537 prostate cancer cells," **52**, 20-33 (2002).
- 538 16. J. Pfitzenmaier, J. E. Quinn, A. M. Odman, J. Zhang, E. T. Keller, R. L. Vessella, E. J. J. o. B. Corey, and  
539 M. Research, "Characterization of C4-2 prostate cancer bone metastases and their response to castration," **18**, 1882-  
540 1888 (2003).
- 541 17. C. Lee, A. Grodzinsky, H. P. Hsu, and M. J. J. o. O. R. Spector, "Effects of a cultured autologous  
542 chondrocyte-seeded type II collagen scaffold on the healing of a chondral defect in a canine model," **21**, 272-281  
543 (2003).
- 544 18. T. Sone, T. Tamada, Y. Jo, H. Miyoshi, and M. J. B. Fukunaga, "Analysis of three-dimensional  
545 microarchitecture and degree of mineralization in bone metastases from prostate cancer using synchrotron  
546 microcomputed tomography," **35**, 432-438 (2004).
- 547 19. X. Bi, J. A. Sterling, A. R. Merkel, D. S. Perrien, J. S. Nyman, and A. J. B. Mahadevan-Jansen, "Prostate  
548 cancer metastases alter bone mineral and matrix composition independent of effects on bone architecture in mice—a  
549 quantitative study using microCT and Raman spectroscopy," **56**, 454-460 (2013).
- 550 20. A. Sekita, A. Matsugaki, and T. J. B. Nakano, "Disruption of collagen/apatite alignment impairs bone  
551 mechanical function in osteoblastic metastasis induced by prostate cancer," **97**, 83-93 (2017).
- 552 21. J. F. De Boer, C. K. Hitzberger, and Y. J. B. o. e. Yasuno, "Polarization sensitive optical coherence  
553 tomography—a review," **8**, 1838-1873 (2017).
- 554 22. B. J. A. S. Baumann, "Polarization sensitive optical coherence tomography: a review of technology and  
555 applications," **7**, 474 (2017).
- 556 23. Y. J. I. J. o. S. T. i. Q. E. Yasuno, "Multi-Contrast Jones-Matrix Optical Coherence Tomography—The  
557 Concept, Principle, Implementation, and Applications," **29**, 1-18 (2023).
- 558 24. M. P. Roudier, "Phenotypic heterogeneity of end-stage prostate carcinoma metastatic to bone," (2003).
- 559 25. M. P. Roudier, C. Morrissey, L. D. True, C. S. Higano, R. L. Vessella, and S. M. Ott, "Histopathological  
560 Assessment of Prostate Cancer Bone Osteoblastic Metastases," **180**, 1154-1160 (2008).
- 561 26. X. Zhou, F. Eltit, X. Yang, S. Maloufi, H. Alousaimi, Q. Liu, L. Huang, R. Wang, and S. Tang, "Detecting  
562 human articular cartilage degeneration in its early stage with polarization-sensitive optical coherence tomography,"  
563 *Biomed. Opt. Express* **11**, 2745-2760 (2020).
- 564 27. X. Zhou, S. Maloufi, D. C. Louie, N. Zhang, Q. Liu, T. K. Lee, and S. Tang, "Investigating the  
565 depolarization property of skin tissue by degree of polarization uniformity contrast using polarization-sensitive optical  
566 coherence tomography," *Biomed. Opt. Express* **12**, 5073-5088 (2021).
- 567 28. J. Golde, F. Tetschke, J. Walther, T. Rosenauer, F. Hempel, C. Hannig, E. Koch, and L. J. J. o. b. o. Kirsten,  
568 "Detection of carious lesions utilizing depolarization imaging by polarization sensitive optical coherence tomography,"  
569 **23**, 071203-071203 (2018).
- 570 29. Z. Xin, J. Myeong Jin, H. Lin, and T. Shuo, "Slope-based segmentation of articular cartilage using  
571 polarization-sensitive optical coherence tomography phase retardation image," *Journal of Biomedical Optics* **24**,  
572 036006 (2019).
- 573 30. L. Duan, S. Makita, M. Yamanari, Y. Lim, and Y. J. O. e. Yasuno, "Monte-Carlo-based phase retardation  
574 estimator for polarization sensitive optical coherence tomography," **19**, 16330-16345 (2011).
- 575 31. S. Makita, M. Yamanari, and Y. J. O. e. Yasuno, "Generalized Jones matrix optical coherence tomography:  
576 performance and local birefringence imaging," **18**, 854-876 (2010).
- 577 32. S. Guo, J. Zhang, L. Wang, J. S. Nelson, and Z. J. O. L. Chen, "Depth-resolved birefringence and differential  
578 optical axis orientation measurements with fiber-based polarization-sensitive optical coherence tomography," **29**,  
579 2025-2027 (2004).
- 580 33. M. Yamanari, M. Mase, R. Obata, M. Matsuzaki, T. Minami, S. Takagi, M. Yamamoto, N. Miyamoto, K.  
581 Ueda, and N. J. S. R. Koide, "Melanin concentration and depolarization metrics measurement by polarization-sensitive  
582 optical coherence tomography," **10**, 19513 (2020).
- 583
